# Supplementary material
Source: publisher site journal article supplement (https://www.spandidos-publications.com/4174/downloadSupplementary)
Supplement: Supplementary file 1 [file downloadSupplementary]

## Sheet: TCGA_diff_logFC1_p0.05
Table SV. Differentially expressed miRNAs in TCGA dataset.
gene_name	logFC	AveExpr	t	P.Value	adj.P.Val	B	UP_DOWN	TCGA.3M.AB46.01	TCGA.3M.AB47.01	TCGA.B7.5816.01	TCGA.B7.5818.01	TCGA.B7.A5TI.01	TCGA.B7.A5TJ.01	TCGA.B7.A5TK.01	TCGA.B7.A5TN.01	TCGA.BR.4183.01	TCGA.BR.4184.01	TCGA.BR.4187.01	TCGA.BR.4188.01	TCGA.BR.4191.01	TCGA.BR.4201.01	TCGA.BR.4253.01	TCGA.BR.4255.01	TCGA.BR.4256.01	TCGA.BR.4257.01	TCGA.BR.4267.01	TCGA.BR.4279.01	TCGA.BR.4280.01	TCGA.BR.4292.01	TCGA.BR.4294.01	TCGA.BR.4357.01	TCGA.BR.4361.01	TCGA.BR.4362.01	TCGA.BR.4363.01	TCGA.BR.4366.01	TCGA.BR.4367.01	TCGA.BR.4368.01	TCGA.BR.4369.01	TCGA.BR.4370.01	TCGA.BR.4371.01	TCGA.BR.6452.01	TCGA.BR.6453.01	TCGA.BR.6454.01	TCGA.BR.6455.01	TCGA.BR.6456.01	TCGA.BR.6457.01	TCGA.BR.6458.01	TCGA.BR.6563.01	TCGA.BR.6564.01
hsa-let-7c-3p	-1.19131	4.00907	-3.80424	0.000160802	0.00136894	-2.91117	DOWN	4.59848	6.63078	5.19763	3.17282	6.22417	5.57541	2.46903	5.27778	6.61819	4.65818	6.56612	6.10094	5.01314	6.02004	1.66858	7.34715	5.93701	3.49094	3.39148	5.72273	3.87857	0	5.6689	4.26077	3.70337	3.79277	5.79212	3.50635	4.84695	5.04155	5.24918	6.57887	1.66858	4.07701	6.64336	5.64838	5.39024	5.71268	6.85827	6.44269	5.74484	6.59161
hsa-let-7c-5p	-1.14154	11.6172	-4.27549	2.30597e-05	0.000236819	-1.06693	DOWN	12.2801	13.7046	11.1715	8.89855	12.5838	11.7333	12.1437	12.2126	12.5838	11.415	13.6098	13.3184	10.9553	11.5962	9.55958	13.4101	12.5838	9.64174	9.52131	13.3184	8.82388	8.86294	12.0074	10.1511	11.3497	10.0612	11.415	10.4768	12.5067	11.7333	12.0074	11.6629	9.16843	9.97585	13.5086	11.8642	12.1437	12.4315	12.8512	11.7333	14.9006	14.0067
hsa-let-7e-3p	-1.45139	4.84783	-8.14785	3.30197e-15	1.42425e-13	21.0817	DOWN	4.20668	4.19852	5.4122	3.64505	3.42352	4.9836	3.977	4.64096	5.702	4.90981	5.00382	5.07849	5.27778	4.52805	2.8145	5.86926	5.6689	4.58154	5.45643	4.84695	3.40828	3.34718	3.43108	4.89308	4.97269	1.46785	4.8203	4.66612	5.50074	4.8847	5.30996	6.05432	3.87052	3.81365	4.63168	4.42683	4.79437	5.55438	6.51522	5.90313	6.13782	6.21142
hsa-miR-1-3p	-3.8549	6.74603	-9.62483	3.75263e-20	3.4685e-18	32.3512	DOWN	5.07849	6.84557	4.45192	3.79277	4.83806	8.20143	9.97585	5.89158	7.95374	6.39406	10.9553	10.0612	5.14737	6.27209	2.30791	11.0063	9.68581	3.49094	3.82683	10.0612	4.60655	4.93633	6.45491	4.96328	7.18033	1.46785	3.76934	5.07849	5.6689	8.9375	6.06558	8.05742	2.72455	5.23942	6.19867	4.86493	8.16794	9.68581	9.93485	6.19867	8.86294	11.3497
hsa-miR-100-5p	-1.10588	12.928	-4.56634	6.33037e-06	7.44682e-05	0.170612	DOWN	10.7318	14.5532	13.0365	11.7976	13.0365	13.5086	14.2217	11.1181	14.116	12.7547	14.5532	14.2217	12.5067	12.9482	11.5343	14.7815	13.3184	11.0629	11.2884	14.6644	10.3347	10.6131	11.5962	12.4315	14.116	12.2126	13.2192	11.9341	13.4101	14.116	12.5838	12.8512	10.4277	11.2287	14.0067	13.2192	13.4101	14.0067	14.9006	14.3311	15.037	14.5532
hsa-miR-101-5p	-1.28154	4.15693	-7.21825	2.09949e-12	6.03721e-11	14.7175	DOWN	3.00801	5.01314	2.25042	3.57019	4.18188	4.9836	4.69314	3.96258	4.28335	3.34718	3.00801	4.61463	4.15734	2.9565	4.43522	4.61463	4.37366	2.50717	5.02281	4.18188	3.87857	2.92132	4.61463	3.52452	4.49332	3.21832	3.0925	4.36626	4.75594	4.59001	3.49823	4.47618	4.95387	2.12296	4.73868	4.41007	4.05261	4.66612	4.58154	5.25894	4.37366	5.29841
hsa-miR-105-5p	2.13057	3.01473	3.45944	0.000590046	0.00447812	-4.13208	UP	0	0.874073	0	1.21943	0	3.45391	0	8.56216	0	3.34718	0	0	1.87724	1.99453	0	1.88616	0	0	0	0	0	2.02768	6.67158	9.05093	5.68011	0	0	8.16794	2.91258	3.47624	4.52805	2.47907	0	0	0	0	0.617493	9.32648	1.38436	5.46691	0	0
hsa-miR-1247-3p	-1.27663	4.45561	-3.43227	0.000650839	0.00484015	-4.22361	DOWN	1.29074	3.96979	6.85827	5.07849	5.38089	4.69314	3.15671	6.14997	6.14997	5.03249	7.03024	5.34155	4.15734	6.87228	2.8145	6.95595	7.55398	4.73028	4.06085	9.64174	4.41007	3.88661	4.61463	5.84704	5.29841	3.21832	8.60075	5.98477	2.91258	5.61763	9.64174	8.37919	3.53456	5.6689	6.94069	3.92375	4.73868	5.64838	8.63619	4.41845	8.09509	6.43091
hsa-miR-1258	-1.77095	1.22548	-7.69433	8.28135e-14	2.82002e-12	17.9019	DOWN	0.931207	2.89151	0	2.53663	1.10338	1.88616	1.15012	1.29975	0	0	4.14919	4.14919	0	1.99453	1.66858	4.36626	2.90619	0	0	0	0	1.25865	0	0	1.3433	0	2.34827	0	4.02724	0	0	4.02724	0	0.30822	2.48435	2.93006	1.02901	2.53044	2.65728	0.538498	3.58553	3.98565
hsa-miR-125a-5p	-1.14572	10.0922	-8.15088	3.2302e-15	1.41691e-13	21.1034	DOWN	9.52131	9.93485	10.9043	9.20514	9.55958	10.5674	10.0612	11.1715	10.0612	10.2411	9.97585	10.1943	9.55958	9.32648	8.11396	11.1715	10.0177	9.52131	10.4277	10.0177	8.15038	8.4335	9.93485	9.36657	9.28569	8.37919	8.97474	9.40695	9.68581	9.44423	11.2884	10.7554	8.11396	10.1943	9.55958	10.4277	9.68581	11.0063	10.9553	10.6581	10.287	11.0629
hsa-miR-125b-2-3p	-1.36048	4.61256	-4.33976	1.74368e-05	0.000181962	-0.799941	DOWN	4.86493	7.11799	3.53456	1.63769	5.68011	5.21841	5.47739	5.24918	5.44484	4.21583	6.85827	6.76769	1.87724	4.8847	2.30791	6.72934	5.61763	3.18074	3.39148	6.12568	3.87857	1.25865	5.6689	1.82695	4.42683	3.79277	2.76134	2.99982	5.92585	5.21841	4.65818	5.25894	2.72455	2.54854	6.59161	4.81144	4.54363	5.55438	6.44269	4.56287	8.7852	7.06117
hsa-miR-125b-5p	-1.33323	10.2226	-5.78005	1.35326e-08	2.31936e-07	6.12303	DOWN	9.40695	11.2884	10.4277	9.28569	10.3347	10.8526	11.3497	10.8032	10.9043	9.84743	11.1181	11.0629	9.01358	9.89237	7.91718	11.7976	10.6581	8.71046	8.27292	11.0063	7.68457	7.48779	10.4768	8.7852	9.89237	8.27292	9.38676	8.91802	9.32648	10.7554	9.80601	10.2177	7.28578	9.40695	11.2884	11.1715	10.7554	11.7333	12.2801	11.5962	11.6629	12.2126
hsa-miR-1262	-1.31891	1.41857	-7.06051	5.91776e-12	1.53152e-10	13.6983	DOWN	1.70063	0.874073	0.456646	0.430518	0.665348	2.24569	1.15012	0	0	0	3.49094	3.98565	1.87724	0	0	2.34827	2.156	0	0	2.53663	0	0	0	1.19035	2.16282	0	1.72214	1.31126	2.2894	2.23687	1.81334	0	0	1.9554	0.590699	0	2.09423	1.61117	0.498513	0.196592	0	2.46903
hsa-miR-1269a	1.80758	2.16288	3.38125	0.00078108	0.00571027	-4.39363	UP	0	0	1.98927	0.430518	1.93744	0	0	0	0	0	0	0	0	2.54258	0	8.9375	0	0	3.82683	1.90988	0	0	4.61463	2.19608	1.3433	1.46785	0	5.39024	0	0	10.7083	2.47907	0	0	0	9.30608	0.335317	1.11654	1.38436	5.61763	0	0
hsa-miR-129-2-3p	-1.24115	1.00603	-5.376	1.19608e-07	1.82086e-06	4.00348	DOWN	0.520252	3.64505	0	0	0	0	1.80694	0	0	0	1.85285	0	0	0	0	1.88616	1.58635	0	0	1.90988	0	0	0	0	0	0	0	0	0	0	0	0	0	0.30822	1.04068	0	0	3.65319	0.498513	0	3.37815	1.7197
hsa-miR-129-5p	-2.75921	3.4282	-8.0504	6.6744e-15	2.78602e-13	20.3867	DOWN	0	3.64505	1.10338	2.40186	0	0.464438	4.22498	0.903109	0	1.90543	3.75215	4.50201	0	0	2.30791	5.08875	3.87857	0	0	3.977	0	1.25865	4.33572	0	2.944	0	0	0	0	3.47624	3.37815	3.82005	0	1.16418	2.93703	2.01541	0.849465	7.39442	3.96258	0.538498	5.50074	5.50074
hsa-miR-1301-3p	1.05472	4.4558	6.94932	1.21549e-11	3.05407e-10	12.9908	UP	3.80725	3.76934	5.91468	5.38089	4.02724	4.81144	5.1272	5.1272	5.22965	4.90981	4.8203	3.78508	5.14737	4.99451	6.59161	4.84695	5.44484	5.43326	4.8847	4.69314	4.18188	4.78393	4.61463	5.27778	4.75594	3.45391	6.67158	4.51937	4.02724	5.21841	5.83596	4.47618	4.95387	5.34155	4.09261	5.37155	4.71225	4.5722	4.47618	5.65864	4.37366	3.93138
hsa-miR-1307-3p	1.04295	11.6701	7.26828	1.50589e-12	4.37893e-11	15.0445	UP	12.0074	11.5343	12.5067	11.9341	11.6629	12.0761	11.1181	12.5838	11.5962	11.5343	10.8032	10.6131	10.6581	11.7976	11.1181	11.5343	11.4708	12.357	11.1181	10.3347	11.7976	11.2884	9.60145	11.6629	11.8642	12.5838	11.4708	11.2287	10.8526	12.0074	11.7976	10.3347	10.7083	12.0761	11.2287	10.6131	11.5343	12.0074	11.0629	11.0629	9.93485	10.6581
hsa-miR-130b-3p	1.11115	5.65084	6.9173	1.49297e-11	3.67983e-10	12.7888	UP	6.03207	6.39406	4.86493	6.56612	7.18033	6.28439	5.39024	5.15801	5.702	4.90981	4.47618	3.12134	5.40122	5.71268	6.00802	4.9451	4.37366	5.84704	5.88042	4.84695	5.95989	6.49027	4.61463	5.46691	5.62839	6.6049	5.68011	6.07685	4.92724	4.77348	6.82018	4.02724	5.25894	6.41914	6.12568	5.05061	6.00802	4.79437	5.00382	5.46691	5.27778	4.84695
hsa-miR-130b-5p	1.41891	4.96079	7.78503	4.39538e-14	1.62503e-12	18.5266	UP	4.05261	4.84695	5.73278	6.94069	5.82488	5.51203	3.33234	5.04155	5.29841	5.61763	3.23164	3.78508	6.02004	5.33127	5.62839	5.03249	4.89308	6.26104	4.50201	3.76131	7.58875	6.57887	4.61463	5.24918	5.37155	6.19867	6.72934	6.19867	3.67782	5.04155	7.52047	5.25894	5.86926	6.61819	4.63168	4.72188	5.84704	4.63168	4.66612	5.25894	1.67695	4.01103
hsa-miR-133a-3p	-3.85388	6.19146	-10.0705	9.44665e-22	1.28673e-19	36.004	DOWN	4.20668	5.71268	4.48475	2.72455	4.3279	6.94069	8.67431	5.94845	7.84665	6.6049	9.76616	9.12636	5.53377	6.27209	3.80001	9.72696	9.40695	3.75215	4.06085	8.46884	4.80291	4.47618	4.9451	5.18811	6.80749	0	4.5722	5.07849	4.49332	9.05093	6.28439	8.41584	3.53456	4.90147	4.73868	4.84695	8.30803	9.60145	9.44423	6.22417	7.40992	10.3779
hsa-miR-133a-5p	-2.04597	0.896157	-9.93038	3.0418e-21	3.42268e-19	34.8435	DOWN	0	0	0	0	0	0.947931	2.99163	0	0	0	0	3.78508	0	2.54258	0	3.31948	2.156	0	0	0	0	0	0	0	0	0	0	0	0	1.62288	0.430518	0	0	0	0.321947	0	1.17306	2.24128	2.98442	0.196592	1.67695	2.88321
hsa-miR-133b	-4.12535	3.37477	-10.8324	1.37608e-24	3.56129e-22	42.491	DOWN	1.29074	1.7703	1.98927	0.430518	0.665348	3.33976	6.3595	1.68491	3.31948	4.59001	7.16456	6.27209	3.33976	3.65319	1.66858	6.83287	7.27152	0	2.54258	5.95989	2.77325	1.25865	2.88321	2.53663	5.22965	0	2.76134	2.77817	1.90543	7.16456	3.49823	5.73278	1.66858	2.7673	2.4071	2.18768	6.07685	6.83287	6.64336	3.52452	5.68011	8.27292
hsa-miR-135a-5p	-1.17506	1.70704	-4.19655	3.23503e-05	0.000327041	-1.38983	DOWN	0	0	0	0	0.665348	2.24569	0	0.903109	0	0	2.70677	2.10587	2.54854	0	0	3.31948	0	0	3.63507	0	0	1.25865	8.56216	0	0	0	2.34827	1.31126	1.90543	0	3.26324	0	6.00802	2.54854	1.67695	6.69993	7.14878	1.11654	2.48435	1.18088	1.67695	2.58969
hsa-miR-135b-3p	1.79474	1.87058	7.80306	3.87281e-14	1.45258e-12	18.6515	UP	2.22098	1.41672	1.69089	2.86734	4.11809	2.41602	3.33234	0.476936	0	2.59794	1.85285	0	3.06378	0	3.51448	0	1.58635	0	4.3512	0	0	1.25865	0	4.26077	0	0	2.76134	1.31126	1.90543	1.62288	1.81334	0	3.18818	0.78858	0.118469	2.53663	1.17306	0.207074	0	0.880521	0	0
hsa-miR-135b-5p	3.48162	6.5654	11.3907	9.62414e-27	6.22682e-24	47.4249	UP	7.78306	5.65864	6.4787	8.41584	8.48652	8.82388	7.88151	8.45116	5.07849	9.08838	6.64336	6.06558	8.30803	8.37919	8.23839	7.55398	7.34715	8.63619	11.6629	5.48906	8.23839	8.27292	0	9.08838	3.977	6.53825	7.50413	8.71046	7.10319	7.28578	8.27292	9.28569	9.84743	6.59161	4.73868	8.41584	5.05061	5.6689	5.11815	6.80749	6.94069	6.94069
hsa-miR-137	-1.38122	0.512017	-7.51946	2.76498e-13	8.51877e-12	16.7136	DOWN	0	0	0	0	2.47907	0	0	0	0	0	0	0	0	0	0	0	3.37815	0	0	0	0	0	3.43108	0	0	0	0	0	0	0	0	0	0	0	0	0	0	0.560379	1.38436	0.196592	0	0.825483
hsa-miR-139-3p	-2.67195	4.60212	-10.4777	2.98501e-23	5.94246e-21	39.4341	DOWN	2.22098	5.40122	1.69089	2.72455	4.58154	4.34354	6.65747	2.69915	4.39155	3.04719	6.19867	5.55438	2.54854	4.3279	2.30791	4.25239	4.72188	3.18074	4.64096	3.54649	0	1.25865	0	0	1.74368	4.37366	2.34827	2.77817	3.86012	4.59001	2.84092	3.82005	0	2.54854	5.27778	2.7673	4.28335	5.14737	5.63838	3.17282	7.62065	6.03207
hsa-miR-139-5p	-2.34578	6.8892	-12.2717	2.90089e-30	2.5025e-27	55.4921	DOWN	4.86493	7.30005	5.53377	4.9836	6.72934	7.48779	7.91718	6.08889	7.04571	6.24999	8.41584	8.3611	7.00077	6.43091	6.10094	8.48652	8.23839	5.43326	7.11799	7.00077	5.2687	4.75594	6.79356	4.89308	4.83806	6.11331	6.46714	5.98477	5.6689	8.13283	6.53825	7.88151	5.17838	5.47739	7.48779	5.28687	6.69993	7.58875	8.34301	5.69133	6.61819	8.18468
hsa-miR-141-3p	1.96064	11.2174	8.34099	8.03786e-16	4.07882e-14	22.4777	UP	10.6131	10.4277	10.8526	11.7333	12.2126	12.4315	11.0629	12.357	11.0629	11.6629	9.72696	11.0063	12.0074	10.6581	11.0629	9.84743	10.0612	11.3497	12.6687	10.8526	13.2192	12.4315	14.2217	11.1181	11.415	11.415	12.2126	11.6629	10.8032	11.5343	12.1437	11.0629	12.8512	11.5962	9.93485	12.8512	11.8642	10.7083	9.89237	10.9553	10.5238	10.2411
hsa-miR-141-5p	2.12294	10.4944	9.62547	3.73302e-20	3.4685e-18	32.3564	UP	9.84743	10.0177	10.8032	12.4315	10.3779	10.3347	10.9043	11.9341	9.64174	10.8526	9.32648	10.7554	11.1715	9.78609	11.4708	9.60145	9.72696	9.84743	10.9043	10.1511	12.4315	11.0629	13.2192	10.7554	10.1943	10.9043	10.5238	10.9043	11.7976	10.9043	11.4708	9.4833	11.5962	10.4277	9.89237	12.357	11.4708	10.0612	10.287	10.107	9.76616	10.4768
hsa-miR-142-3p	1.31519	12.633	5.71691	1.91856e-08	3.24524e-07	5.78296	UP	11.2287	12.5067	13.2192	15.4502	11.7976	11.2287	12.8512	11.3497	13.4101	13.0365	12.357	11.7333	13.6098	13.9092	16.1255	12.5838	13.4101	13.8031	13.2192	12.0074	13.5086	14.0067	11.7333	13.9092	14.2217	14.116	13.8031	12.5067	12.6687	13.2192	13.5086	13.6098	13.0365	14.4393	14.116	15.1609	15.3007	12.5838	12.9482	13.9092	9.68581	11.8642
hsa-miR-143-5p	-1.50159	8.28351	-7.07899	5.24606e-12	1.37139e-10	13.8167	DOWN	8.23839	7.63736	9.36657	8.86294	6.88629	7.95374	9.01358	8.30803	9.55958	9.36657	9.44423	8.82388	8.86294	9.52131	8.29047	10.7083	10.1943	8.20143	7.65406	8.41584	8.45116	7.95374	7.68457	8.56216	9.60145	7.88151	8.82388	7.98683	7.95374	10.3347	9.16843	10.287	7.23861	8.48652	6.83287	8.13283	9.32648	10.2411	9.80601	8.41584	6.13782	9.68581
hsa-miR-144-3p	-1.69614	3.75899	-6.11695	1.99384e-09	3.82226e-08	7.99205	DOWN	5.55438	3.03002	5.1272	3.79277	2.47907	3.33976	1.15012	0.903109	1.64383	4.44362	3.75215	3.46882	5.07849	4.9451	4.63168	0	5.22965	4.15734	6.71464	4.54363	2.77325	5.46691	2.88321	4.72188	5.02281	3.61141	0	4.82917	3.14851	3.47624	3.01587	0	6.3595	3.25353	4.16538	2.99982	4.01103	2.24128	3.4159	2.69153	0	1.46785
hsa-miR-144-5p	-1.62154	7.73206	-6.97403	1.03661e-11	2.63015e-10	13.1473	DOWN	8.63619	6.56612	9.05093	6.44269	7.84665	7.08838	5.28687	5.08875	7.42543	7.16456	9.05093	8.41584	9.44423	8.50466	7.84665	5.30996	9.4833	7.18033	9.84743	9.80601	7.47239	7.42543	6.07685	8.30803	6.34834	5.6689	4.75594	8.23839	7.331	6.33598	6.46714	6.63078	7.68457	6.85827	7.98683	5.86926	6.77964	6.24999	7.65406	5.98477	5.59657	5.40122
hsa-miR-145-3p	-2.46729	7.72611	-10.978	3.8258e-25	1.10013e-22	43.7633	DOWN	7.14878	7.16456	7.21065	6.91317	7.14878	8.05742	8.48652	7.44121	8.48652	7.76616	9.84743	9.70638	7.37886	8.23839	6.98599	9.68581	9.28569	5.84704	5.61763	9.44423	6.26104	5.35184	6.23708	6.67158	7.58875	5.80347	6.46714	6.55218	7.50413	9.24487	7.30005	8.82388	6.06558	7.07478	7.21065	7.81616	8.56216	9.84743	9.97585	8.20143	7.91718	9.55958
hsa-miR-145-5p	-2.16609	13.3272	-9.19039	1.22194e-18	8.32206e-17	28.8988	DOWN	13.1251	12.8512	12.8512	13.0365	12.0761	13.6098	14.7815	13.7046	13.9092	13.4101	15.7465	13.9092	13.0365	14.2217	12.1437	15.5994	16.1255	12.0074	12.0074	14.2217	11.7333	11.9341	12.6687	13.2192	13.8031	11.7333	12.5067	12.5838	12.2126	15.5994	13.4101	15.3007	11.3497	12.357	12.357	13.7046	14.9006	15.4502	15.7465	13.6098	12.7547	15.5994
hsa-miR-1468-5p	-1.30154	3.67843	-6.18434	1.34513e-09	2.63727e-08	8.37678	DOWN	3.57694	4.50201	3.00801	3.79277	2.77817	3.58553	3.50635	2.50717	3.96979	2.59794	3.94759	4.61463	3.82683	0	3.80001	3.31948	2.90619	2.50717	0	4.69314	4.18188	5.05942	5.79212	3.90208	3.70337	5.19763	3.0925	3.96979	2.62198	2.23687	6.82018	3.36334	4.69314	3.56345	4.16538	2.93006	3.42352	4.44362	2.98442	2.43049	4.5107	3.98565
hsa-miR-146b-3p	1.33456	7.69567	9.21658	9.93602e-19	7.1429e-17	29.1037	UP	5.93701	7.06117	8.27292	8.67431	8.37919	7.00077	8.74689	7.21065	8.11396	6.91317	9.4833	7.73274	8.13283	8.30803	8.7852	8.09509	8.65525	8.27292	6.38236	7.53722	7.58875	6.91317	5.24918	8.74689	7.68457	7.11799	6.61819	6.44269	7.78306	7.57136	6.14997	7.91718	7.00077	7.78306	8.74689	8.34301	7.95374	8.05742	8.30803	7.95374	7.88151	7.34715
hsa-miR-146b-5p	1.75537	10.737	11.2065	5.02583e-26	1.85812e-23	45.7812	UP	8.60075	10.2177	10.5238	11.2287	11.9341	10.3779	12.5838	11.0063	11.2884	9.89237	11.8642	10.8032	11.6629	11.4708	13.0365	10.5674	11.8642	11.7976	9.80601	10.8032	10.7083	10.4277	9.76616	12.2801	10.4277	9.80601	10.6131	10.0612	11.1715	11.1715	10.1511	10.4768	10.5674	10.8526	10.9553	10.7554	10.6131	10.4768	10.0612	10.8526	11.4708	10.0177
hsa-miR-149-5p	-1.72976	5.3745	-7.84148	2.95497e-14	1.12463e-12	18.9183	DOWN	5.95989	5.21841	5.65864	4.62315	4.99451	4.85594	5.04155	4.46821	4.46821	6.6049	4.89308	4.73028	4.15734	5.52332	2.8145	5.30996	5.91468	5.58626	4.06085	5.95989	3.87857	4.22498	5.98477	5.35184	5.02281	5.75691	5.24918	5.84704	4.70262	5.13729	7.98683	5.11815	3.18818	5.80347	4.44362	4.59848	3.68689	5.97233	5.79212	5.32061	5.27778	6.39406
hsa-miR-17-5p	1.08262	10.6686	6.8234	2.71695e-11	6.57147e-10	12.2008	UP	11.2884	10.3347	9.93485	12.9482	11.1181	12.5067	10.8032	10.9553	9.80601	10.8032	9.24487	9.32648	9.84743	9.84743	10.7554	9.52131	10.287	11.2287	11.0063	9.36657	12.2801	11.1715	10.2411	9.89237	10.4768	10.6131	9.93485	10.1943	10.3347	10.3779	11.2287	9.05093	11.4708	10.6581	10.3779	9.44423	12.2126	9.24487	9.20514	9.84743	9.4833	8.7852
hsa-miR-181a-3p	1.25497	8.45149	9.80741	8.41284e-21	8.70897e-19	33.8342	UP	8.34301	8.86294	7.71622	8.13283	8.9375	9.24487	8.89855	8.63619	8.86294	8.86294	9.01358	9.01358	9.12636	9.12636	9.84743	8.97474	8.86294	8.34301	7.91718	9.05093	7.84665	7.63736	8.39751	8.60075	8.37919	8.50466	8.67431	7.88151	8.86294	7.88151	10.0177	8.89855	6.67158	7.84665	8.71046	8.9375	9.80601	8.71046	8.89855	9.97585	8.82388	8.02134
hsa-miR-181b-3p	1.63037	4.62711	8.24563	1.61955e-15	7.62074e-14	21.7854	UP	4.5107	3.82683	5.61763	5.64838	3.78508	5.16865	4.69314	4.84695	6.03207	4.90981	5.00382	4.83806	6.67158	6.56612	8.18468	5.91468	5.99639	6.05432	6.12568	5.35184	5.79212	5.35184	5.57541	6.34834	6.23708	6.88629	6.9712	5.24918	5.78076	5.95989	8.20143	7.22463	4.16538	5.92585	4.58154	6.32363	7.11799	5.62839	5.47739	7.45699	4.14919	3.48366
hsa-miR-182-5p	1.85079	14.7449	9.28166	5.93118e-19	4.51468e-17	29.6149	UP	14.7815	14.7815	15.5994	15.9235	16.1255	16.6338	14.6644	16.3549	15.3007	16.1255	14.4393	14.7815	16.6338	16.3549	15.9235	14.0067	15.7465	16.9459	15.7465	16.1255	16.1255	15.9235	16.6338	15.7465	16.1255	16.6338	16.9459	15.9235	15.5994	16.9459	15.3007	16.9459	15.037	16.1255	14.5532	13.0365	15.1609	14.7815	14.5532	14.4393	14.2217	12.5838
hsa-miR-183-5p	2.1318	13.3066	9.63857	3.35529e-20	3.33981e-18	32.4621	UP	13.6098	13.1251	14.6644	13.9092	14.0067	14.7815	11.9341	14.3311	13.7046	15.4502	12.7547	13.2192	14.7815	15.037	14.116	12.6687	14.3311	16.3549	14.7815	13.7046	15.1609	13.9092	15.7465	14.116	15.4502	16.1255	15.9235	14.5532	14.4393	15.7465	14.116	16.1255	13.4101	15.5994	13.8031	10.8032	13.8031	14.2217	13.0365	13.2192	12.2126	10.7083
hsa-miR-187-3p	-1.80286	3.09215	-4.39569	1.36331e-05	0.000148246	-0.564599	DOWN	2.86734	0	0.172661	0.430518	1.10338	3.58553	4.41845	2.50717	0	0	3.94759	3.78508	7.18033	5.52332	0	6.33598	5.39024	1.86389	3.82683	1.90988	0	0	3.84167	4.61463	0	0	2.76134	3.33234	0	6.51522	1.30278	3.36334	0	0	0.118469	5.33127	0.335317	3.72509	3.66957	1.18088	0	3.84167
hsa-miR-188-5p	1.43645	3.34222	7.20947	2.2252e-12	6.25959e-11	14.6603	UP	5.61763	2.74727	2.80061	3.51448	4.18188	3.91611	4.22498	3.52452	3.31948	3.57019	1.85285	2.10587	3.55497	0	4.26077	1.88616	2.62198	4.46023	5.02281	0	0	3.76131	0	4.10997	2.62198	3.9943	2.76134	3.80725	4.49332	0	2.84092	0	5.95989	4.31878	4.06085	4.14919	3.68689	3.46136	3.55497	3.17282	4.25239	3.48366
hsa-miR-18a-3p	1.58059	2.55303	7.10114	4.53891e-12	1.19864e-10	13.9591	UP	3.12844	1.7703	3.4159	3.45391	2.47907	3.87857	3.33234	3.4159	2.23687	3.34718	0	0	3.33976	0	3.51448	1.31671	3.37815	3.49094	0	0	3.40828	3.11473	0	3.90208	2.944	3.45391	3.49823	3.50635	2.62198	3.21832	4.65818	2.47907	4.16538	3.63507	2.25042	2.39663	4.08481	1.77707	3.18074	2.89981	0	0.825483
hsa-miR-18a-5p	1.60562	6.17782	8.85513	1.66737e-17	9.58924e-16	26.3109	UP	7.331	6.34834	5.02281	6.72934	6.94069	7.68457	6.65747	6.00802	4.82917	5.93701	4.29182	4.33572	5.32061	4.8847	6.26104	4.46023	5.03249	5.99639	5.61763	4.3279	7.34715	6.64336	4.9451	5.75691	6.07685	6.43091	5.24918	4.77348	5.86926	6.18713	7.14878	3.61141	6.56612	5.09892	7.52047	5.62839	6.91317	4.30074	5.39024	4.8847	4.85594	4.86493
hsa-miR-192-3p	1.98559	7.82404	7.11763	4.07441e-12	1.09839e-10	14.0653	UP	8.74689	8.30803	7.27152	7.48779	8.63619	8.89855	6.12568	9.08838	7.48779	8.27292	8.27292	8.7852	8.27292	6.75574	7.98683	6.22417	7.14878	9.16843	8.7852	7.79961	9.80601	9.36657	8.18468	6.98599	8.86294	8.71046	7.06117	10.6581	9.52131	5.61763	9.32648	5.4122	10.1943	8.97474	8.60075	8.63619	8.09509	8.30803	8.37919	8.23839	7.84665	7.84665
hsa-miR-192-5p	2.46898	16.1224	9.22424	9.35125e-19	6.91458e-17	29.1638	UP	17.3437	16.9459	16.6338	16.6338	16.9459	17.3437	15.037	16.9459	16.3549	17.3437	16.3549	15.9235	16.9459	15.7465	16.9459	14.9006	15.5994	17.3437	17.3437	15.1609	18.8645	18.8645	16.3549	16.1255	17.3437	16.9459	16.3549	18.8645	17.3437	13.3184	18.8645	14.116	18.8645	16.9459	16.3549	17.3437	16.9459	15.9235	14.7815	16.3549	15.4502	14.4393
hsa-miR-193b-5p	-1.31803	2.84165	-6.39983	3.73376e-10	8.05247e-09	9.63098	DOWN	1.70063	0	4.14105	4.5722	2.47907	3.02374	3.80725	4.06085	0	4.65818	2.34304	0	3.06378	1.99453	0	3.76934	2.90619	4.15734	1.90099	2.99163	0	0	0	3.52452	2.16282	1.46785	4.47618	1.31126	3.54052	2.6622	3.69597	3.61141	2.72455	3.0712	1.85847	3.38481	2.17582	3.33234	3.66957	3.25353	2.23687	2.88321
hsa-miR-194-3p	2.55343	8.05279	9.20491	1.08957e-18	7.62113e-17	29.0124	UP	9.32648	9.55958	7.95374	8.05742	9.32648	9.08838	5.56455	9.32648	8.27292	7.88151	7.50413	8.86294	7.97029	6.38236	8.63619	6.18713	7.88151	8.23839	7.6047	6.29669	10.0177	8.89855	5.90313	6.61819	7.74926	8.56216	6.83287	9.12636	9.05093	5.29841	9.36657	5.99639	9.24487	9.12636	9.05093	8.16794	7.74926	7.78306	7.00077	7.58875	6.9712	7.23861
hsa-miR-194-5p	2.42992	14.8397	10.0621	1.01393e-21	1.31202e-19	35.9338	UP	16.1255	15.7465	14.7815	14.5532	15.9235	15.5994	14.4393	15.7465	15.037	15.3007	14.9006	15.3007	15.4502	14.6644	15.5994	13.8031	13.7046	15.9235	15.4502	13.9092	16.6338	16.6338	14.4393	14.3311	15.9235	15.5994	14.6644	17.3437	16.3549	12.5838	16.3549	12.6687	17.3437	15.3007	15.9235	15.037	14.5532	14.6644	13.9092	14.7815	14.5532	14.116
hsa-miR-195-3p	-2.08908	2.91588	-8.9373	8.84199e-18	5.58124e-16	26.9388	DOWN	1.29074	3.96979	3.71793	1.99978	2.47907	3.02374	3.15671	2.20109	3.31948	0	4.14919	5.21841	2.54854	1.99453	1.66858	3.61824	3.58553	0	3.03002	4.18188	0	2.54258	3.84167	1.82695	2.16282	1.46785	2.34827	1.85566	0	2.95025	0.886811	2.47907	1.66858	3.0712	3.51448	2.66753	3.42352	3.93949	5.05061	3.17282	4.30965	4.8847
hsa-miR-195-5p	-1.73803	6.64866	-9.28933	5.58026e-19	4.37628e-17	29.6754	DOWN	6.84557	8.52279	6.94069	4.84695	6.56612	6.69993	7.00077	5.35184	6.94069	6.07685	7.84665	7.98683	6.33598	6.92693	6.16278	8.05742	6.74254	4.99451	6.05432	7.06117	5.09892	5.35184	6.23708	5.61763	6.59161	5.19763	5.60687	5.32061	6.00802	6.71464	5.91468	6.46714	5.32061	5.37155	8.63619	6.3595	6.51522	6.59161	8.13283	6.59161	9.84743	9.32648
hsa-miR-196a-5p	5.0517	7.87647	13.8798	5.15609e-37	6.67198e-34	70.978	UP	11.9341	8.9375	10.9553	3.64505	6.34834	7.78306	8.34301	7.81616	9.93485	9.52131	5.76884	9.70638	2.54854	9.24487	5.46691	9.16843	5.39024	7.11799	4.23449	5.75691	8.86294	8.05742	0	9.16843	9.24487	7.22463	7.62065	9.03226	9.60145	9.72696	10.4277	7.0155	8.37919	10.7554	6.71464	10.0177	3.57694	6.53825	8.74689	7.65406	6.49027	5.84704
hsa-miR-196b-5p	4.29199	8.965	11.0877	1.44752e-25	4.68271e-23	44.7294	UP	11.5962	10.7554	12.2801	6.59161	7.62065	10.4277	7.11799	10.1943	11.2287	11.9341	6.00802	7.78306	5.53377	11.415	5.05061	8.71046	9.52131	13.0365	4.8847	7.89935	10.0612	11.6629	4.33572	9.84743	11.6629	10.8032	8.45116	10.8526	10.1943	10.287	14.0067	10.7083	13.1251	13.1251	9.36657	10.7083	5.33127	11.5343	8.48652	12.0761	7.71622	6.31016
hsa-miR-19a-3p	1.25777	6.70979	7.99198	1.01473e-14	4.1033e-13	19.9731	UP	7.21065	5.60687	5.69133	8.30803	8.20143	8.97474	6.79356	7.93546	6.91317	7.16456	6.50274	6.06558	6.52673	6.06558	7.58875	5.03249	6.33598	7.62065	6.85827	5.40122	9.01358	8.02134	8.45116	7.19549	6.89973	6.77964	6.24999	6.55218	7.18033	6.56612	7.81616	5.11815	7.88151	5.63838	6.71464	5.75691	7.21065	5.10909	5.28687	5.55438	5.27778	4.40081
hsa-miR-19b-1-5p	1.03204	4.8934	6.50979	1.9154e-10	4.16559e-09	10.2849	UP	5.52332	4.19852	3.31124	7.81616	5.16865	6.03207	4.31878	5.04155	4.14105	3.34718	2.70677	4.50201	3.06378	3.65319	5.1272	4.11809	3.58553	3.49094	4.50201	3.54649	7.22463	5.91468	4.33572	4.5107	3.51448	4.83806	3.49823	4.36626	5.20716	4.18188	4.79437	3.61141	5.17838	4.26783	3.73405	3.62508	5.69133	3.17282	3.48366	3.92375	3.58553	3.31124
hsa-miR-200a-3p	2.07211	10.7515	8.70698	5.17961e-17	2.79268e-15	25.1892	UP	11.7976	10.2177	10.6581	10.8526	11.7333	11.1181	10.6356	11.6629	10.6581	11.3497	9.60145	10.5674	10.1511	10.4277	10.6581	9.36657	9.36657	11.5653	11.415	9.93485	12.2126	12.1437	7.11799	11.3497	12.0761	11.9341	11.0063	11.7976	9.93485	9.60145	9.44423	9.84743	12.0761	11.9341	9.97585	10.8526	10.107	8.82388	9.72696	10.3347	9.36657	8.60075
hsa-miR-200a-5p	2.27013	11.6062	10.1425	5.16116e-22	8.34817e-20	36.604	UP	13.4101	12.0761	12.2126	12.5067	12.6687	11.5962	10.4768	12.7547	12.2126	11.8642	10.5674	12.0761	11.7333	11.6629	12.5453	10.9553	11.0063	12.5838	12.0761	11.2884	13.4101	12.6687	7.55398	12.7547	12.5838	13.0365	12.357	12.6687	11.9341	10.6131	10.5674	11.415	12.7547	12.5067	11.7976	11.415	11.5962	10.1943	11.2884	11.1181	10.1511	9.89237
hsa-miR-200b-3p	2.04875	12.1469	9.41255	2.08598e-19	1.74146e-17	30.6505	UP	13.0365	11.9341	11.9341	12.2801	12.9482	12.6687	11.5343	12.6687	11.8642	12.1437	10.9043	11.9341	11.5343	11.1181	11.8642	10.2411	9.97585	12.6687	12.1437	11.3497	13.3184	13.1251	8.65525	13.0365	12.8512	12.9482	12.2801	12.9482	11.3497	11.0629	10.9553	10.9553	13.8031	13.3184	11.7333	11.2884	11.7976	10.8032	11.1715	11.6629	11.415	10.287
hsa-miR-200b-5p	1.83432	6.81666	7.58828	1.72474e-13	5.44346e-12	17.1787	UP	8.56216	7.74926	7.08838	7.98683	7.55398	6.57887	5.64838	6.85827	6.82018	7.63736	5.45643	7.19549	6.22417	6.43091	7.44121	5.39024	5.6689	8.05742	7.21065	6.64336	8.63619	8.52279	3.84167	7.55398	7.81616	8.41584	7.95374	8.13283	6.12568	5.38089	5.09892	5.51203	8.82388	8.61847	7.65406	6.24999	7.23861	5.47739	6.27209	7.28578	5.74484	5.11815
hsa-miR-200c-3p	1.84715	14.4633	8.88813	1.29305e-17	7.6055e-16	26.5625	UP	13.9092	14.4393	14.4393	15.037	14.6644	14.9006	14.5532	15.3007	14.2217	14.5532	13.5086	13.7046	15.3007	13.1251	13.8031	12.9482	13.2192	14.5532	14.9006	13.6098	15.4502	14.6644	15.9235	13.7046	14.7815	14.7815	14.2217	14.0067	14.0067	14.3311	15.5994	13.2192	15.3007	14.7815	13.6098	14.9006	14.7815	13.8031	13.6098	13.8031	14.7815	13.4101
hsa-miR-200c-5p	1.60743	6.25671	7.54116	2.38343e-13	7.43171e-12	16.8599	UP	5.65864	7.27152	5.93701	7.10319	6.56612	5.64838	4.78393	5.78076	5.83596	5.82488	3.23164	6.65747	6.83287	4.67488	6.51522	5.39024	6.22417	5.93701	5.37155	5.48906	7.78306	6.98599	7.48779	4.5107	4.35886	7.14878	5.60687	4.87481	6.37067	6.27209	5.80347	5.88042	7.03024	6.14997	7.45699	7.3633	7.39442	5.37155	5.84704	6.72934	6.29669	6.14997
hsa-miR-202-5p	-1.22885	0.695989	-7.19283	2.48398e-12	6.91241e-11	14.552	DOWN	0	1.41672	1.10338	0	3.36334	1.31126	0	0	0	0	0	2.10587	0	0	0	0	0	0	0	1.90988	0	0	0	0	0	0	0	0	0	0	0	0	0	0.78858	2.25042	1.17026	0	1.35666	2.28164	1.7197	2.23687	1.16418
hsa-miR-203a-3p	1.07366	14.3269	3.57207	0.000390265	0.00309818	-3.74531	UP	14.6644	14.3311	15.3007	14.116	14.9006	15.3007	13.2192	14.9006	15.7465	16.3549	14.2217	15.7465	14.3311	15.9235	16.3549	13.3184	13.6098	11.7333	16.1255	14.5532	15.7465	16.1255	11.415	15.5994	16.9459	16.3549	15.5994	16.9459	14.9006	13.7046	13.8031	15.5994	16.1255	15.4502	12.9482	11.3497	13.9092	13.5086	13.2192	12.0074	12.9482	12.357
hsa-miR-203b-3p	1.60187	7.34744	4.3789	1.46819e-05	0.00015832	-0.635506	UP	7.18033	8.02134	9.12636	8.27292	8.34301	9.16843	2.46903	10.3347	9.97585	9.97585	8.37919	9.89237	8.89855	9.01358	4.63168	8.67431	7.70039	5.50074	10.3347	9.08838	9.55958	9.55958	5.39024	9.52131	10.6581	11.0629	9.89237	9.93485	9.28569	8.97474	9.12636	9.60145	8.48652	9.52131	7.23861	5.20716	4.05261	5.82488	6.55218	6.07685	5.86926	5.29841
hsa-miR-204-5p	-3.2807	2.94105	-10.3045	1.31185e-22	2.26338e-20	37.9639	DOWN	2.00842	3.64505	3.53456	0	3.28713	1.64383	4.93633	1.29975	4.14105	0	3.23164	3.78508	3.06378	3.37074	0	2.34827	2.156	0	1.90099	4.42683	0	2.54258	4.10997	2.19608	2.16282	0	3.31948	2.49124	0	1.62288	1.30278	0	4.59848	2.7673	2.87528	3.38481	3.61824	4.39155	4.66612	6.32363	4.14919	5.95989
hsa-miR-20a-5p	1.01765	10.0774	5.88431	7.55236e-09	1.36682e-07	6.69169	UP	10.1943	9.89237	8.34301	11.4708	11.0063	12.2801	10.3779	10.5238	9.08838	9.44423	8.7852	9.05093	8.60075	8.82388	9.72696	9.01358	9.16843	9.72696	9.72696	8.76605	11.5343	10.1511	9.97585	8.86294	9.36657	9.44423	8.48652	9.08838	9.80601	9.55958	9.68581	8.23839	10.107	9.01358	9.68581	8.48652	10.3347	8.20143	8.45116	8.56216	9.01358	8.41584
hsa-miR-20b-5p	-1.18518	4.72466	-4.55639	6.62412e-06	7.75711e-05	0.12708	DOWN	6.9712	3.25353	4.79437	2.944	4.3279	3.87857	4.06893	4.54363	3.56345	4.21583	5.50074	4.91815	4.34354	2.9565	3.80001	5.61763	5.74484	2.50717	8.20143	3.977	2.77325	2.02768	4.61463	6.4066	2.62198	3.61141	4.91815	3.96979	3.67782	4.68365	6.59161	3.82005	3.36334	1.9554	3.39148	6.64336	2.83206	3.83362	4.43522	1.98458	2.6822	4.97269
hsa-miR-21-3p	1.46327	12.9969	10.1019	7.25985e-22	1.10521e-19	36.2653	UP	13.5086	12.0074	13.5086	14.9006	13.4101	13.1251	12.7547	13.6098	12.7547	12.9482	13.0365	12.6687	13.8031	13.2192	14.3311	13.1251	14.6644	13.6098	13.9092	13.5086	14.116	13.8031	12.5067	14.0067	12.9482	13.9092	13.7046	13.2192	13.3184	13.0365	12.4315	14.0067	13.3184	12.8512	13.0365	13.9092	13.3184	13.1251	13.5086	13.7046	10.9553	12.1437
hsa-miR-21-5p	2.06822	19.5281	20.7311	1.77268e-68	4.5877e-65	143.329	UP	20.0762	20.0762	20.0762	20.0762	20.0762	20.0762	18.8645	20.0762	20.0762	20.0762	18.8645	18.8645	20.0762	20.0762	20.0762	20.0762	18.8645	20.0762	20.0762	20.0762	20.0762	20.0762	17.8327	20.0762	20.0762	20.0762	20.0762	20.0762	20.0762	18.8645	20.0762	18.8645	20.0762	20.0762	18.8645	20.0762	17.8327	18.8645	18.8645	20.0762	18.8645	18.8645
hsa-miR-210-3p	1.0665	9.58349	3.22615	0.00134124	0.00899048	-4.89558	UP	10.5238	8.41584	12.6687	13.1251	9.76616	9.03226	9.68581	11.8642	9.68581	13.3184	8.61847	8.09509	8.52279	11.8642	10.0612	8.82388	10.107	13.4101	11.8642	8.60075	13.1251	11.415	8.52279	11.7976	12.1437	12.8512	12.5838	11.0629	8.27292	10.5238	12.2801	11.1715	12.5838	12.1437	6.22417	10.4768	10.9043	9.28569	7.84665	9.52131	3.76131	5.98477
hsa-miR-215-3p	1.12713	3.20629	2.55929	0.0107972	0.0580938	-6.79477	UP	2.66753	4.81144	5.02281	4.5107	8.23839	5.2687	0	4.29182	4.39155	5.03249	2.34304	0	2.54854	3.65319	5.05061	0	4.20668	7.21065	0	0	6.91317	6.12568	0	0	6.83287	5.53377	0	8.52279	3.86012	0	7.74926	0	7.8314	4.80291	8.16794	3.19562	1.80694	0	3.96258	1.18088	0	2.58969
hsa-miR-215-5p	1.32061	10.6413	3.28809	0.00108346	0.00746617	-4.6978	UP	11.7333	11.4708	11.415	10.9043	14.4393	11.6629	8.11396	10.7083	10.3347	12.0074	10.5238	11.1715	10.8032	11.0063	11.9341	8.74689	11.415	14.116	11.5343	8.67431	13.6098	12.7547	10.5456	10.3779	13.2192	11.8642	9.60145	14.6644	11.4708	8.09509	14.6644	9.52131	14.2217	10.7083	15.4502	12.6687	7.91718	8.89855	10.1943	8.71046	12.1437	10.0612
hsa-miR-218-5p	-1.61957	6.3112	-7.18364	2.63945e-12	7.26691e-11	14.4923	DOWN	4.05261	6.9712	6.17559	5.80347	7.74926	5.86926	7.3633	5.27778	7.3633	6.24999	7.93546	8.46884	5.32061	6.51522	4.26077	7.00077	7.00077	3.49094	4.8847	7.19549	4.18188	4.14105	6.53825	5.69133	7.22463	4.72188	6.67158	5.98477	6.00802	6.45491	6.88629	5.25894	4.16538	4.69314	8.34301	6.55218	7.18033	6.37067	7.81616	8.9375	8.02134	8.71046
hsa-miR-24-1-5p	-1.06784	5.63395	-6.72277	5.12457e-11	1.19481e-09	11.5779	DOWN	5.72273	6.63078	5.05061	4.90147	5.56455	6.28439	5.93701	6.17559	5.37155	5.82488	5.63838	6.57887	6.24999	5.52332	4.14919	6.14997	6.27209	3.49094	4.06085	6.06558	3.87857	4.86493	7.23861	5.18811	5.29841	3.9943	4.25239	5.00382	6.08889	7.16456	4.84695	6.4066	4.44362	6.05432	5.99639	6.19867	5.75691	6.41914	6.3595	6.55218	4.65024	7.55398
hsa-miR-28-5p	-1.0652	8.81931	-9.01604	4.79631e-18	3.11433e-16	27.5444	DOWN	8.67431	9.16843	8.58145	9.12636	8.52279	8.45116	9.12636	8.89855	8.56216	8.30803	9.52131	9.55958	9.18679	8.34301	8.05742	9.89237	9.32648	7.97029	7.76616	9.32648	8.09509	8.16794	7.8314	7.81616	8.60075	7.52047	8.37919	8.82388	8.74689	9.40695	8.02134	8.86294	8.45116	8.52279	8.45116	8.27292	8.71046	9.4833	9.4833	8.48652	8.97474	9.97585
hsa-miR-29b-2-5p	-1.28169	6.32155	-8.89066	1.26802e-17	7.6055e-16	26.5819	DOWN	5.14737	6.44269	5.48906	5.44484	6.02004	6.22417	6.53825	6.72934	6.87228	5.25894	6.19867	7.0155	6.39406	6.11331	5.62839	7.22463	6.82018	5.18811	6.95595	6.64336	5.2687	5.75691	8.76605	6.04319	4.54363	5.1272	5.34155	5.07849	5.60687	6.22417	4.92724	5.79212	5.05942	6.88629	5.86926	6.67158	6.29669	7.00077	7.42543	6.38236	5.56455	7.14878
hsa-miR-29c-3p	-1.70681	12.7193	-9.95023	2.57912e-21	3.03398e-19	35.0073	DOWN	11.8642	12.4315	10.4768	10.5674	12.2801	12.0074	13.4101	10.5674	12.0761	10.9553	12.5067	12.8512	12.4315	12.0074	12.2126	12.2801	12.1437	10.1511	12.2801	12.7547	10.8032	12.0074	15.5994	12.5067	11.0629	12.357	11.0629	11.0063	12.2801	12.1437	11.3497	12.0074	11.2287	11.0629	13.2192	13.4101	12.4315	12.5067	13.3184	12.1437	12.5838	13.8031
hsa-miR-29c-5p	-1.34848	6.16061	-9.51803	8.92245e-20	7.6971e-18	31.4924	DOWN	5.02281	6.06558	5.37155	6.80749	4.77348	5.93701	5.78076	5.60687	6.82018	6.11331	6.31016	6.57887	7.52047	5.4122	6.61819	7.39442	6.95595	6.45491	7.331	6.29669	6.12568	6.85827	9.72696	6.49027	5.57541	5.04155	6.59161	5.69133	6.14997	6.80749	5.01314	6.46714	5.71268	7.03024	6.17559	6.77964	6.65747	6.79356	7.55398	6.69993	5.93701	7.45699
hsa-miR-30a-3p	-1.68663	12.8638	-8.19975	2.26403e-15	1.04631e-13	21.4544	DOWN	12.6687	11.7976	13.4101	15.1609	12.7547	12.1437	12.4315	14.116	13.5086	13.1251	14.116	15.037	13.7046	12.8512	12.9482	14.6644	14.0067	11.4708	14.5532	14.0067	11.415	12.2126	12.9482	12.9482	12.2126	12.2801	12.9482	13.5086	13.7046	13.4101	12.7547	13.9092	10.5238	12.2126	13.4101	14.5532	13.0365	14.4393	15.1609	13.3184	13.3184	15.1609
hsa-miR-30a-5p	-1.11323	15.0199	-6.19715	1.24768e-09	2.46487e-08	8.45033	DOWN	15.037	14.9006	15.1609	16.1255	15.5994	14.6644	16.1255	16.6338	16.1255	15.5994	16.9459	16.6338	16.3549	15.1609	14.9006	16.6338	16.6338	13.9092	17.8327	15.9235	13.0365	14.3311	14.6644	14.5532	13.6098	13.6098	14.5532	15.1609	16.1255	16.3549	14.9006	15.4502	12.1437	13.4101	15.037	16.3549	14.0067	15.7465	15.9235	14.6644	14.6644	16.9459
hsa-miR-30c-2-3p	-1.86255	5.87609	-7.77359	4.76246e-14	1.71184e-12	18.4475	DOWN	6.45491	6.32363	4.28335	5.72273	6.64336	5.4122	6.41914	7.03024	4.39155	3.82683	6.53825	6.94069	5.53377	3.65319	4.52805	6.28439	5.32061	1.86389	5.74484	5.88042	0	4.3826	4.9451	3.71793	3.37815	2.14294	3.31948	4.10129	6.31016	5.04155	3.96258	3.61141	2.25042	3.9943	5.6689	5.82488	4.16538	5.89158	5.90313	4.82917	7.81616	7.6047
hsa-miR-3199	-1.38653	1.03657	-8.32885	8.79034e-16	4.37488e-14	22.3892	DOWN	0	1.41672	1.10338	0.884101	0	1.31126	1.15012	0	1.64383	0	0	3.12134	0	0	0	1.88616	1.58635	0	0	1.90988	0	0	0	0	0	1.46785	0	0	2.91258	1.62288	0.430518	1.90099	0	0	2.09971	0.905641	0.617493	0.874073	1.02901	1.18088	2.6822	1.7197
hsa-miR-326	-1.42139	3.9312	-7.6156	1.42874e-13	4.62199e-12	17.3642	DOWN	3.00801	4.06085	5.53377	5.27778	3.16491	2.83206	2.7673	3.46136	3.96979	3.04719	3.49094	2.72455	3.55497	3.37074	4.63168	4.11809	3.87857	4.73028	3.63507	4.3279	4.80291	4.86493	0	5.30996	5.95989	4.21583	4.5722	6.3595	3.54052	5.71268	4.30965	5.18811	4.16538	5.83596	5.08875	4.20668	5.59657	5.05942	5.69133	4.60655	2.23687	4.26783
hsa-miR-328-3p	-1.10411	5.57419	-7.45274	4.35587e-13	1.31081e-11	16.2658	DOWN	4.05261	5.05061	6.9712	7.14878	4.77348	5.21841	4.93633	5.38089	6.59161	5.34155	6.11331	5.34155	4.58154	5.33127	5.05061	6.69993	6.37067	5.53377	5.53377	5.58626	5.2687	3.60276	3.84167	5.69133	5.15801	5.04155	5.51203	4.66612	4.14919	6.05432	5.6689	5.93701	5.6689	6.49027	5.33127	6.51522	6.46714	6.94069	7.07478	6.26104	5.22965	6.10094
hsa-miR-335-3p	1.56881	7.84137	8.17331	2.74464e-15	1.24616e-13	21.2643	UP	8.86294	7.84665	8.23839	9.16843	9.05093	9.72696	7.23861	7.00077	7.81616	8.91802	7.11799	7.63736	6.91317	7.91718	9.08838	7.18033	6.74254	9.20514	8.82388	8.82388	9.16843	7.71622	11.2884	7.65406	8.74689	7.47239	8.02134	8.02134	8.41584	7.57136	8.86294	7.18033	8.34301	8.7852	8.23839	6.59161	9.36657	8.74689	7.47239	7.78306	6.43091	5.76884
hsa-miR-338-5p	-1.03356	4.90079	-4.80023	2.12616e-06	2.68415e-05	1.21984	DOWN	5.14737	3.03002	3.46882	5.90313	5.86926	4.56287	2.7673	5.50074	3.56345	5.52332	5.16865	5.62839	4.15734	5.23942	3.51448	3.61824	4.58154	5.53377	2.54258	5.07849	5.89158	6.03207	6.23708	6.10094	4.67488	3.21832	0	6.76769	6.39406	5.89158	3.14202	4.60655	5.93701	4.95387	4.01913	6.07685	2.76134	3.93949	4.96328	2.12984	5.36169	4.46023
hsa-miR-363-3p	-1.72403	4.0168	-6.66311	7.43931e-11	1.71901e-09	11.2122	DOWN	5.47739	3.64505	3.61824	1.99978	3.42352	3.33976	4.59001	3.06378	3.00801	3.34718	5.36169	5.60687	3.55497	4.3279	2.8145	4.36626	4.9836	1.86389	6.75574	5.2687	0	2.54258	4.33572	6.94069	2.62198	2.54854	1.72214	4.27488	3.14851	4.31878	5.4122	4.21583	2.25042	1.71083	4.84695	4.73868	2.76134	3.93949	4.73868	2.2894	2.6822	5.29841
hsa-miR-365a-3p	-1.51616	6.58892	-11.3419	1.49383e-26	7.73208e-24	46.9876	DOWN	6.71464	6.22417	6.67158	5.69133	5.93701	6.74254	6.84557	7.70039	6.55218	6.68575	8.05742	7.34715	5.79212	7.23861	5.62839	7.55398	7.19549	6.19867	7.44121	7.63736	3.40828	5.11815	6.23708	7.42543	6.76769	7.28578	7.19549	5.39024	6.31016	7.70039	5.702	7.48779	4.44362	5.88042	5.92585	5.69133	5.52332	6.34834	7.07478	5.83596	7.10319	7.28578
hsa-miR-365b-3p	-1.51346	6.58871	-11.3154	1.89544e-26	8.17565e-24	46.7509	DOWN	6.71464	6.22417	6.64336	5.72273	5.93701	6.74254	6.84557	7.70039	6.55218	6.68575	8.05742	7.34715	5.79212	7.23861	5.46691	7.55398	7.19549	6.19867	7.48779	7.63736	3.40828	5.11815	6.23708	7.42543	6.76769	7.28578	7.19549	5.39024	6.31016	7.70039	5.702	7.52047	4.44362	5.88042	5.92585	5.69133	5.52332	6.31016	7.03024	5.83596	7.10319	7.28578
hsa-miR-378a-3p	-1.07531	11.2414	-6.65713	7.72145e-11	1.76842e-09	11.1757	DOWN	9.55958	12.6687	11.0063	11.6629	12.5067	10.5238	10.6356	10.2411	10.107	10.0177	11.3497	11.4708	11.2884	10.0612	12.4315	11.2287	10.9553	11.9341	10.2411	11.0629	12.8512	12.5838	9.52131	10.7083	11.9341	12.0761	12.0417	10.8032	10.2411	11.415	10.287	9.89237	11.415	11.7333	11.6629	9.52131	11.0629	10.287	10.4277	9.60145	11.8642	10.9553
hsa-miR-378a-5p	-1.54224	8.5443	-10.3167	1.18167e-22	2.1844e-20	38.0676	DOWN	7.98683	9.72696	8.52279	9.08838	9.28569	8.13283	7.30005	8.20143	7.10319	6.94069	7.81616	8.03938	7.97029	7.0155	8.52279	7.30005	7.98683	8.37919	7.00077	8.09509	9.20514	9.08838	4.33572	7.73274	8.52279	8.82388	8.52279	7.62065	6.49027	7.42543	6.56612	6.52673	7.78306	9.28569	8.82388	7.42543	8.41584	7.55398	8.02134	7.00077	7.68457	7.91718
hsa-miR-378c	-1.27658	5.14642	-7.21528	2.14121e-12	6.08952e-11	14.6981	DOWN	4.37366	5.50074	4.33572	5.03249	6.22417	5.21841	5.72273	4.29182	4.60655	4.44362	5.93701	6.3595	5.23942	2.54258	5.80347	4.9451	5.22965	4.85594	5.21841	5.13729	7.00077	6.64336	2.88321	4.05261	5.73278	4.53584	5.68011	5.39024	4.75594	5.64838	3.87052	3.82005	5.54422	5.45643	4.58154	4.20668	4.11809	4.06085	3.76934	2.54854	6.04319	5.05942
hsa-miR-378d	-1.5444	1.44903	-7.65734	1.07057e-13	3.50714e-12	17.6487	DOWN	0.520252	1.41672	1.30581	1.99978	0	1.31126	2.46903	1.29975	1.64383	1.90543	0	2.72455	1.87724	0	2.30791	1.88616	0	0	1.90099	0	0	0	0	0	1.74368	0	0	0	0	0	0	0	2.72455	0.78858	0.321947	2.01541	0	0.874073	0.498513	1.18088	0	2.14918
hsa-miR-379-3p	-1.08777	0.845482	-6.21819	1.10246e-09	2.21175e-08	8.57134	DOWN	0	0.874073	2.43049	0	0	0	0	1.68491	0	0	2.34304	2.10587	0	0	0	0	0	0	0	0	0	0	2.88321	0	1.3433	0	2.76134	0	0	0	0.430518	0	0	0.78858	1.85847	0	0.114276	2.24128	2.00842	2.12984	4.14919	1.7197
hsa-miR-383-5p	-2.01384	0.976856	-9.01558	4.81349e-18	3.11433e-16	27.5409	DOWN	0	0	0.172661	0	3.59412	0.464438	0	0.476936	0	0	2.70677	2.10587	0	0	0	1.88616	0	0	0	0	0	2.54258	0	0	0	0	0	0	0	0	0.430518	0	0	0	0.590699	0.134727	0	0.560379	4.25239	0	1.67695	2.14918
hsa-miR-3934-5p	1.13824	1.89616	5.31124	1.67563e-07	2.50666e-06	3.67636	UP	2.00842	0.874073	2.43049	1.21943	3.78508	3.21107	1.80694	3.29506	2.6622	1.90543	0	0	0	0	1.66858	1.88616	2.156	3.95508	0	0	0	2.54258	0	0	1.3433	0	0	2.49124	3.67782	0	2.56885	1.90099	3.53456	1.71083	1.85847	0.380692	0.849465	1.11654	0	0.538498	1.67695	0.825483
hsa-miR-411-5p	-1.05749	4.29932	-5.73349	1.75106e-08	2.98141e-07	5.87194	DOWN	4.65818	5.69133	5.1272	3.37815	4.58154	4.06085	4.31878	4.89308	4.28335	4.21583	4.47618	5.21841	3.82683	4.67488	2.30791	4.25239	3.37815	4.58154	2.54258	5.2687	3.40828	2.54258	5.47739	3.90208	4.30965	2.89981	4.91815	3.66132	4.63168	3.67782	2.18768	3.36334	2.72455	3.49094	5.22965	3.303	3.88661	4.90147	3.9091	4.97269	7.78306	5.40122
hsa-miR-429	2.0038	9.45238	7.73733	6.13717e-14	2.14635e-12	18.1974	UP	11.1181	9.76616	9.64174	9.58052	10.0612	9.52131	8.63619	9.28569	9.60145	9.76616	8.74689	9.36657	8.74689	8.97474	9.44423	8.32552	8.16794	10.9553	9.64174	9.24487	10.7554	11.4708	6.07685	10.3347	10.9553	10.9553	10.4277	10.5674	8.97474	8.56216	8.48652	8.34301	11.1181	11.5343	10.0177	8.56216	9.40695	8.34301	8.9375	10.2641	8.27292	6.4787
hsa-miR-431-5p	1.4656	2.05674	7.11359	4.18369e-12	1.11623e-10	14.0393	UP	2.22098	2.74727	3.20334	2.40186	2.24128	0.464438	2.46903	3.29506	2.23687	1.90543	3.94759	3.12134	2.54854	2.9565	3.51448	2.69153	2.156	2.50717	0	3.54649	0	1.25865	0	0	2.944	3.21832	1.72214	3.33234	2.2894	2.23687	0	4.36626	0	2.25515	1.85847	1.17026	1.80694	2.89151	2.98442	2.75431	4.65024	1.91983
hsa-miR-4326	1.14645	4.08583	3.93553	9.54101e-05	0.000860353	-2.41757	UP	6.10094	4.19852	4.90981	4.16538	5.63838	6.24999	5.35184	5.58626	0	3.82683	3.94759	4.33572	4.87481	5.23942	4.01103	4.25239	3.58553	4.58154	0	2.53663	0	2.54258	3.84167	1.82695	2.944	4.21583	3.0925	3.80725	3.37074	3.21832	2.69915	1.90099	2.72455	0	0	0	3.26324	3.26324	3.83362	3.77738	4.01103	3.93138
hsa-miR-451a	-1.69855	9.93331	-7.16484	2.98771e-12	8.13915e-11	14.3704	DOWN	11.3497	9.44423	10.5674	7.91718	9.36657	9.84743	8.27292	6.76769	8.71046	8.56216	10.1943	9.24487	10.5238	9.36657	9.36657	7.65406	10.8032	8.89855	11.3497	10.2411	8.37919	9.72696	8.9375	9.44423	9.32648	8.00408	7.50413	10.1511	9.16843	8.48652	7.00077	8.30803	10.2411	8.23839	10.2411	9.01358	9.01358	8.52279	10.0177	9.89237	7.3633	8.18468
hsa-miR-4661-5p	1.31214	3.07635	5.34885	1.37827e-07	2.08595e-06	3.86588	UP	3.44627	2.62198	2.25042	4.08481	2.98442	3.21107	1.15012	3.52452	3.31948	4.44362	2.34304	4.50201	4.34354	3.37074	3.21107	5.76884	2.90619	2.85234	3.03002	3.31948	3.87857	4.93633	3.84167	4.14919	6.64336	6.75574	4.8203	5.32061	3.37074	0	7.71622	3.61141	4.28335	3.16491	3.4159	2.39663	2.89151	2.24128	3.18074	2.69153	4.14919	2.99163
hsa-miR-4662a-5p	-1.16003	4.17035	-5.02353	7.1921e-07	9.7964e-06	2.26582	DOWN	5.02281	4.11809	3.35526	2.40186	4.77348	4.91815	2.7673	4.06085	4.91815	3.04719	5.36169	6.02004	3.82683	4.00266	1.66858	5.03249	4.04438	2.85234	4.23449	8.05742	2.77325	2.54258	4.10997	4.72188	2.62198	3.61141	3.76934	4.44362	3.37074	4.46023	2.56885	4.02724	0	1.9554	3.61141	1.8693	3.02374	4.75594	4.58154	3.65319	2.6822	4.61463
hsa-miR-486-5p	-2.1429	8.02077	-9.86764	5.11657e-21	5.51737e-19	34.3276	DOWN	8.89855	8.45116	10.287	6.51522	7.11799	8.16794	6.27209	4.29182	6.14997	8.60075	8.30803	7.53722	8.05742	6.80749	6.69993	5.71268	8.74689	7.39442	9.55958	8.46884	6.56612	7.11799	6.14997	7.89935	6.28439	5.80347	5.95989	7.10319	5.60687	8.37919	4.75594	6.34834	7.55398	7.65406	7.74926	6.88629	6.10094	7.42543	7.13339	6.00802	6.17559	5.76884
hsa-miR-490-3p	-3.66016	3.01165	-7.66216	1.03537e-13	3.43529e-12	17.6817	DOWN	1.70063	0.874073	0	0	2.24128	3.58553	8.11396	0.476936	5.17838	3.04719	5.45643	6.65747	0	4.18188	0	5.82488	5.82488	0	2.54258	4.92724	0	0	2.88321	0	3.82683	0	0	0	0	5.43326	0.886811	3.61141	0	0.78858	0.118469	0	5.36169	7.331	6.23708	0	2.23687	7.74926
hsa-miR-490-5p	-2.12273	0.695015	-10.5246	1.99509e-23	4.30275e-21	39.8343	DOWN	0	0	0	0	0	0	2.7673	0	0	0	2.70677	3.46882	0	0	0	0	1.58635	0	0	2.53663	0	0	0	0	0.861849	0	0	0	0	2.6622	0	0	0	0	0	0	1.63769	1.96179	2.48435	0	0	3.31124
hsa-miR-491-5p	-1.23197	2.01889	-6.63515	8.85131e-11	1.99193e-09	11.0417	DOWN	1.29074	2.2894	2.10587	0.430518	0.665348	2.6457	0	1.68491	2.6622	3.57019	3.49094	3.46882	2.54854	0	3.51448	2.69153	3.10812	2.50717	0	3.54649	0	3.60276	4.9451	4.14919	0.861849	3.21832	4.08481	1.31126	0	1.62288	1.81334	2.93703	3.36334	3.37815	1.85847	1.69688	2.67286	2.24128	3.10031	1.85847	0	1.7197
hsa-miR-497-5p	-1.29557	5.93373	-7.87523	2.3283e-14	8.99348e-13	19.1535	DOWN	5.36169	7.16456	6.29669	4.41007	5.1272	5.71268	6.27209	4.46821	5.97233	4.8203	6.9712	6.49027	5.79212	5.52332	5.05061	6.61819	6.43091	4.15734	5.95989	6.06558	3.87857	5.11815	4.61463	5.18811	6.12568	4.61463	4.5722	5.19763	4.33572	6.39406	5.36169	5.83596	4.8847	4.90147	7.81616	5.80347	6.41914	6.19867	7.78306	6.49027	6.88629	8.11396
hsa-miR-4999-5p	-1.12779	1.243	-5.63587	2.98908e-08	4.8903e-07	5.35127	DOWN	0.520252	0.874073	1.69089	0.430518	0	2.08875	3.50635	0	0	0	0	2.10587	0	0	0	1.31671	0	0	0	2.99163	0	1.25865	0	0	0	0	0	0	1.90543	0	0	0	1.66858	0	1.04068	2.01541	1.41018	1.61117	0	0	0	1.7197
hsa-miR-500b-3p	1.28009	2.20817	6.21366	1.13224e-09	2.25402e-08	8.54527	UP	2.66753	2.50717	0.456646	2.72455	2.77817	1.64383	1.80694	3.16491	1.64383	0	2.70677	3.46882	2.54854	0	3.21107	0	2.156	0	3.03002	2.53663	0	2.02768	0	3.71793	0	0	2.34827	2.18175	2.91258	0	0.430518	0	2.25042	1.71083	1.48343	1.45627	1.96818	0.560379	2.14918	1.18088	0	1.7197
hsa-miR-501-3p	1.3313	7.10074	8.57426	1.41353e-16	7.31643e-15	24.1961	UP	7.95374	6.67158	7.00077	7.331	8.30803	6.61819	6.39406	7.93546	8.41584	7.3633	7.58875	7.63736	9.18679	7.55398	8.29047	7.71622	7.76616	8.60075	8.30803	7.73274	7.34715	7.81616	6.37067	8.34301	7.00077	7.66931	8.9375	7.95374	8.20143	7.16456	7.95374	8.27292	8.56216	8.05742	8.13283	7.74926	7.27152	6.64336	6.9712	6.67158	5.97233	6.43091
hsa-miR-501-5p	1.12779	3.56915	6.08571	2.39007e-09	4.45e-08	7.81492	UP	3.57694	2.89151	2.43049	2.40186	4.93633	3.21107	5.04155	4.23449	3.96979	4.05261	2.70677	3.46882	3.33976	2.54258	3.51448	1.88616	2.62198	2.85234	4.50201	2.99163	0	4.03581	2.88321	3.90208	2.62198	3.79277	3.49823	2.18175	4.24401	3.21832	3.01587	2.47907	4.81144	2.92132	3.28004	4.81144	2.76134	2.63051	3.66957	2.98442	0	2.79542
hsa-miR-503-5p	1.92649	4.11164	10.0173	1.47422e-21	1.81681e-19	35.5623	UP	3.23164	4.55325	4.14105	6.21142	3.66132	4.46023	4.85594	4.12621	6.38236	5.18811	3.75215	3.12134	6.28439	4.00266	6.32363	6.33598	5.71268	6.68575	5.21841	4.18188	5.58626	4.93633	4.61463	4.5107	4.59848	3.9943	5.86926	4.82917	4.02724	4.46023	4.62315	5.30996	6.23708	5.18811	3.82005	4.8847	5.62839	5.18811	4.03581	5.78076	2.6822	3.39988
hsa-miR-504-5p	-1.34018	0.867246	-7.60141	1.57559e-13	5.03411e-12	17.2678	DOWN	0	0	0	0	0	0	0	1.68491	0	0	1.85285	2.10587	0	1.99453	0	1.88616	0	0	0	1.90988	0	0	0	0	0	0	0	0	1.27621	0	0.886811	2.93703	0	0	1.85847	1.69688	1.02901	0.874073	0	1.85847	1.67695	2.14918
hsa-miR-509-3p	1.38549	1.82834	4.67379	3.85655e-06	4.7079e-05	0.646718	UP	3.92375	3.03002	0.820144	2.72455	0	1.88616	0	2.69915	2.23687	1.90543	4.74731	3.98565	3.33976	2.54258	2.8145	3.10031	1.58635	2.50717	0	0	4.41007	3.88661	0	1.82695	1.74368	6.06558	0	3.96979	0	0	2.69915	0	3.69597	2.92132	1.04068	3.07862	0.335317	0.207074	0	0	4.37366	0.376499
hsa-miR-548ba	-1.42329	0.399484	-9.54906	6.94224e-20	6.19535e-18	31.7412	DOWN	0	0	0.820144	0	0	0	1.80694	0.476936	0	0	3.00801	0	0	0	0	3.31948	2.62198	0	0	0	0	0	0	0	1.3433	0	0	0	0	3.21832	0	0	0	0	0	0	0.849465	1.11654	2.28164	0	1.67695	2.58969
hsa-miR-550a-5p	1.15349	3.62655	6.25102	9.08189e-10	1.8507e-08	8.76095	UP	3.65319	2.62198	4.28335	5.86926	3.16491	2.52425	2.46903	3.46136	2.23687	5.52332	3.00801	2.72455	4.58154	2.54258	4.75594	3.76934	4.64096	5.33127	4.06085	4.3279	4.18188	5.59657	3.43108	4.26077	4.09261	4.72188	5.51203	4.36626	5.73278	4.77348	3.96258	2.93703	4.44362	4.5722	3.36334	4.52805	5.93701	4.96328	2.98442	3.96258	1.67695	3.78508
hsa-miR-551b-3p	-1.55651	1.52096	-6.63515	8.85097e-11	1.99193e-09	11.0418	DOWN	3.00801	1.7703	2.43049	1.63769	0	0	2.7673	0.903109	0	2.59794	0	0	3.06378	0	1.66858	1.88616	3.87857	0	1.90099	0	0	0	0	0	1.74368	0	0	1.31126	0	3.21832	1.99978	0	0	1.71083	2.25042	2.83206	3.20334	3.33234	2.48435	2.12984	0	1.16418
hsa-miR-552-3p	2.65109	2.59818	5.69408	2.1749e-08	3.60811e-07	5.66082	UP	5.10909	6.27209	0	0	0	7.55398	1.80694	3.76934	0	4.44362	6.27209	0	0	5.90313	0	0	1.58635	0	0	6.00802	5.89158	3.76131	0	5.46691	0	0	0	5.19763	1.90543	0	3.69597	0	7.62065	0	4.8203	0	0.849465	4.52805	0.498513	0	9.16843	0
hsa-miR-552-5p	3.03178	3.56601	5.56901	4.29262e-08	6.8576e-07	4.99914	UP	7.11799	7.78306	0	0	1.10338	9.60145	3.15671	6.28439	0	5.34155	7.78306	0	0	6.68575	0	0	0	0	0	7.27152	6.83287	5.91468	0	6.72934	0	0	0	5.62839	1.90543	0	5.22965	0	8.30803	0	7.55398	0	2.60618	6.88629	3.31124	0	9.32648	0.376499
hsa-miR-5683	-2.51479	2.01534	-8.08009	5.38998e-15	2.28677e-13	20.5978	DOWN	5.43326	0	0.456646	1.63769	3.42352	5.01314	0	0.903109	3.00801	0	0	4.83806	2.54854	4.79437	0	2.89981	5.32061	0	0	2.53663	0	0	0	1.19035	3.51448	0	1.72214	0	1.27621	3.84167	2.18768	2.93703	2.72455	1.42539	4.9836	0.905641	5.56455	2.35537	1.38436	0.538498	0	4.49332
hsa-miR-577	1.63348	5.1474	4.4528	1.05747e-05	0.000118988	-0.32139	UP	5.36169	2.50717	0.172661	0	6.17559	7.91718	2.46903	5.18811	6.50274	3.82683	6.69993	2.72455	9.05093	9.05093	7.95374	5.39024	5.03249	6.3595	8.54248	5.18811	9.12636	8.37919	4.10997	6.23708	2.62198	4.83806	6.12568	5.98477	6.52673	4.46023	7.78306	6.91317	7.68457	6.82018	5.13729	6.17559	9.4833	5.89158	5.71268	6.94069	0	2.79542
hsa-miR-584-5p	1.05232	7.95596	4.66629	3.99355e-06	4.85226e-05	0.613153	UP	7.91718	5.74484	7.42543	5.16865	6.05432	8.41584	9.64174	8.13283	8.20143	10.5238	9.08838	7.95374	7.78306	10.3779	6.38236	8.20143	7.81616	8.97474	10.1511	8.37919	8.67431	6.91317	5.24918	7.58875	4.42683	7.58875	5.11815	6.13782	10.1511	9.93485	6.71464	10.9043	7.28578	7.07478	6.56612	6.72934	6.03207	9.40695	7.95374	7.28578	7.47239	6.85827
hsa-miR-592	2.05091	3.29375	7.38441	6.91564e-13	2.03383e-11	15.8106	UP	5.02281	3.64505	1.69089	4.41007	4.40081	4.30965	4.14105	3.29506	4.52805	0	0	0	7.25506	1.99453	6.43091	3.10031	2.156	4.33572	5.53377	2.53663	6.44269	6.37067	0	0	2.16282	3.9943	2.34827	3.33234	6.24999	0	4.22498	2.47907	4.03581	4.84695	1.67695	4.69314	4.8203	5.23942	1.84351	4.97269	1.67695	1.46785
hsa-miR-605-5p	-1.03605	0.41127	-8.75803	3.51015e-17	1.93282e-15	25.5742	DOWN	0.520252	0	0	0.430518	0	0	0	0	0	0	0	0	0	0	0	1.31671	0	0	0	0	0	0	0	0	0.861849	0	2.34827	1.31126	0	0	0	0	0	0.78858	0	0.380692	0.114276	0.207074	2.14918	1.60219	0	1.7197
hsa-miR-615-3p	1.33824	2.44921	4.6245	4.84672e-06	5.83409e-05	0.427066	UP	5.19763	0	4.45192	2.24569	1.53843	3.96258	1.15012	1.68491	4.91815	3.82683	2.34304	2.72455	0	3.37074	1.66858	1.31671	0	1.86389	1.90099	0	0	0	0	3.03002	2.16282	0	0	3.80725	4.02724	4.31878	5.16865	2.47907	1.66858	5.74484	0	4.34354	3.68689	0.207074	3.23164	3.56345	0	1.91983
hsa-miR-628-3p	-1.14731	2.01654	-4.92815	1.14843e-06	1.51639e-05	1.8138	DOWN	2.00842	3.64505	1.10338	1.21943	3.71077	3.02374	3.15671	1.29975	2.6622	0	0	0	0	0	1.66858	0	0	0	0	0	0	0	0	0	0	0	0	0	0	0	0	0	0	2.92132	1.99453	2.93006	1.80694	1.11654	0	2.8145	0	1.16418
hsa-miR-6507-5p	-1.20567	0.232786	-10.0929	7.83139e-22	1.12598e-19	36.1901	DOWN	0	0	0	0	0	0	1.15012	0	0	0	0	0	0	0	0	0	0	0	0	0	0	0	0	0	0	0	0	0	0	0	0	0	0	0	0	0	0	0.560379	0	0	0	1.46785
hsa-miR-6511b-3p	-1.02956	2.21666	-5.56098	4.48205e-08	7.05746e-07	4.95714	DOWN	1.29074	2.50717	2.53663	2.53663	2.47907	1.88616	2.19608	3.4159	3.00801	2.59794	2.34304	2.72455	1.87724	2.9565	1.66858	3.31948	2.156	4.33572	3.03002	3.31948	0	2.02768	2.88321	3.52452	2.62198	2.14294	2.34827	2.18175	2.62198	4.46023	1.99978	2.47907	1.66858	2.12296	1.04068	1.69688	3.02374	3.38481	3.4159	2.61408	2.6822	2.71371
hsa-miR-671-5p	1.11999	3.53876	6.77287	3.74009e-11	8.96236e-10	11.887	UP	4.29182	2.74727	3.71793	2.24569	4.18188	4.50201	3.15671	4.40081	3.56345	2.59794	3.49094	0	2.54854	0	2.30791	2.69153	2.62198	3.49094	2.54258	0	2.77325	3.34718	3.43108	3.27296	0.861849	4.37366	2.34827	2.99982	2.62198	2.6622	2.84092	0	3.36334	4.03581	3.01587	3.19562	3.26324	2.35537	3.48366	3.84972	2.6822	2.34304
hsa-miR-6720-3p	-1.84776	1.65723	-7.78261	4.4705e-14	1.62953e-12	18.5099	DOWN	0.931207	2.04958	0	0	2.63905	0	1.80694	2.84092	0	1.90543	1.85285	2.10587	1.87724	0	0	3.31948	0	0	0	1.90988	0	0	0	1.19035	0	4.21583	0	0	0	1.62288	0	1.90099	0	0	0.321947	0.905641	0	1.96179	2.00842	0	2.6822	2.71371
hsa-miR-7-5p	1.61799	4.29996	6.32799	5.74653e-10	1.19936e-08	9.20882	UP	7.06117	5.88042	2.63905	3.79277	4.8847	5.09892	5.68011	3.76934	1.64383	4.21583	1.85285	4.33572	0	1.99453	4.82917	2.34827	2.90619	4.99451	4.3512	0	4.60655	5.82488	9.05093	5.90313	6.45491	5.38089	3.9091	3.96979	2.2894	2.23687	3.61824	0	5.05942	3.9943	4.8203	3.81365	5.42273	3.49823	2.78925	4.29182	3.58553	3.10812
hsa-miR-708-5p	1.07241	5.93639	4.81634	1.96894e-06	2.49785e-05	1.29387	UP	6.28439	8.20143	7.30005	6.85827	7.58875	6.88629	7.18033	8.09509	6.45491	7.58875	5.76884	5.85815	6.44269	7.97029	5.88042	6.38236	6.43091	5.58626	6.02004	6.29669	5.4122	5.35184	3.43108	6.4066	6.53825	5.38089	7.57136	5.73278	6.9712	6.10094	5.13729	5.59657	5.25894	6.65747	6.3595	6.9712	6.27209	6.53825	6.10094	7.88151	6.82018	8.30803
hsa-miR-767-5p	2.1181	2.56013	3.71422	0.000228029	0.00188542	-3.24047	UP	0.520252	0.874073	0	1.21943	0	3.45391	0	7.44121	0	0	0	0	0	0	0	0	0	0	0	0	0	0	4.9451	6.84557	3.37815	0	0	6.39406	0	1.62288	1.62638	0	0	0	0	0	0.114276	7.30005	0	2.49813	0	0
hsa-miR-7705	1.01703	1.43634	5.13764	4.06848e-07	5.75368e-06	2.81685	UP	2.53663	2.04958	0.456646	1.21943	3.16491	1.31126	1.80694	2.20109	0	1.90543	0	0	2.54854	0	0	0	0	0	0	2.53663	3.87857	2.54258	0	1.19035	2.62198	0	0	0	3.54052	0	0.886811	0	1.66858	1.71083	1.32678	0.134727	1.17306	1.61117	0.498513	0.880521	0	0
hsa-miR-877-5p	1.65617	2.63211	7.51615	2.82817e-13	8.61094e-12	16.6913	UP	2.86734	1.41672	2.72845	2.24569	4.40081	3.02374	4.50201	2.944	2.6622	1.90543	0	0	1.87724	0	3.21107	2.89981	0	3.18074	4.50201	0	0	2.54258	0	2.19608	0	1.46785	1.72214	2.18175	0	2.6622	2.69915	2.93703	0	3.81365	1.67695	2.66753	1.96818	0.560379	1.38436	4.15734	2.23687	0.825483
hsa-miR-885-5p	-1.1053	0.23422	-10.6345	7.72125e-24	1.8166e-21	40.7773	DOWN	0	0	0.172661	0	0	0	0	0	0	0	0	0	0	0	1.66858	0	0	2.85234	0	0	0	0	0	0	0	0	0	0	0	0	0	0	0	0	0.118469	0	0	0	1.02901	0	0	0
hsa-miR-887-3p	-1.14187	2.89947	-5.83129	1.01708e-08	1.82792e-07	6.4014	DOWN	2.53663	3.96979	3.77738	3.28004	3.50635	3.70337	3.15671	2.69915	3.31948	3.82683	3.94759	3.98565	2.54854	3.37074	3.51448	3.76934	3.37815	3.18074	0	3.31948	3.40828	2.02768	0	1.82695	1.74368	2.54854	2.34827	1.85566	3.86012	2.95025	3.01587	2.47907	0	3.43108	3.82005	3.62508	4.01103	3.78508	4.27488	3.71793	2.6822	4.06085
hsa-miR-9-3p	-1.70698	1.64274	-6.38146	4.17046e-10	8.91644e-09	9.52266	DOWN	0.931207	2.2894	0	0	1.53843	0.464438	1.15012	0.903109	0	0	0	4.61463	0	0	0	3.10031	0	0	0	1.90988	0	0	5.47739	5.56455	0	0	1.72214	2.49124	0	2.23687	0	0	0	0.30822	0.118469	0	1.41018	5.45643	1.02901	0	2.6822	2.34304
hsa-miR-9-5p	-1.51262	10.3553	-5.17002	3.45438e-07	4.91205e-06	2.97525	DOWN	8.37919	9.05093	8.20143	8.71046	10.1511	8.56216	10.0177	10.6131	9.84743	8.20143	11.2884	14.0067	9.76616	9.97585	9.32648	11.8642	11.7333	7.81616	8.74689	12.2801	10.1511	9.97585	15.4502	15.1609	11.1715	8.97474	12.4315	12.0074	9.08838	11.2287	10.9043	10.4277	8.60075	8.11396	9.01358	8.86294	9.64174	15.5994	11.6629	9.24487	9.64174	11.4708
hsa-miR-92a-1-5p	1.66616	3.42888	7.87844	2.27596e-14	8.92453e-13	19.1759	UP	4.05261	4.19852	3.61824	7.52047	3.84167	5.06823	3.15671	4.40081	3.76934	3.04719	3.49094	3.12134	3.33976	2.9565	5.62839	2.69153	3.37815	3.75215	4.72188	0	6.83287	4.03581	5.24918	1.19035	2.62198	3.61141	1.72214	2.18175	5.86926	4.31878	2.69915	0	4.44362	3.81365	4.78393	3.55497	6.22417	3.03631	3.31124	3.96258	3.10031	1.91983
hsa-miR-93-5p	1.17377	13.846	8.01504	8.60292e-15	3.53403e-13	20.1361	UP	14.5532	14.0067	12.7547	13.2192	14.7815	14.4393	13.7046	14.0067	13.2192	13.8031	12.9482	12.7547	13.4101	13.0365	13.6098	14.116	12.8512	14.4393	13.7046	12.8512	14.0067	13.7046	12.5838	13.5086	13.3184	14.2217	13.6098	13.4101	13.0365	13.5592	13.6098	12.5838	13.5086	13.2192	12.5067	13.8031	13.6098	12.7547	11.9341	12.7547	11.7333	13.1251
hsa-miR-935	1.95122	3.03046	5.80808	1.15781e-08	2.05234e-07	6.27506	UP	5.29841	0	6.03207	5.27778	2.63905	0.947931	3.50635	4.14919	3.76934	3.57019	0	3.98565	0	5.63838	4.43522	5.45643	3.76934	0	6.19867	1.90988	5.58626	6.12568	0	3.52452	5.78076	7.55398	6.19867	4.93633	3.67782	4.8847	5.89158	6.68575	6.95595	6.19867	1.85847	0	4.93633	4.3512	0.498513	4.56287	1.67695	1.46785
hsa-miR-937-3p	1.58946	2.37228	6.11934	1.96641e-09	3.81199e-08	8.00559	UP	2.22098	0	3.07862	1.21943	1.93744	2.83206	1.80694	2.20109	2.6622	1.90543	0	0	0	2.9565	0	4.11809	3.25353	4.99451	4.23449	1.90988	2.77325	2.54258	0	3.27296	3.70337	4.83806	1.72214	2.77817	4.63168	3.84167	1.81334	2.93703	3.69597	2.4071	0.832595	0.643462	3.47624	2.35537	0	2.49813	0	1.91983
hsa-miR-96-5p	1.93846	5.28431	8.662	7.28744e-17	3.84896e-15	24.8514	UP	6.12568	5.40122	4.63168	6.4787	6.72934	7.39442	5.04155	6.45491	5.07849	7.27152	2.70677	4.33572	6.67158	5.90313	5.32061	3.49094	4.5107	7.3633	6.24999	3.977	7.22463	6.23708	8.89855	4.61463	5.78076	6.43091	5.86926	6.69993	4.99451	5.6689	4.42683	6.91317	4.95387	6.92693	5.19763	2.93006	4.99451	4.96328	4.58154	5.05942	4.85594	2.99163
hsa-miR-99a-3p	-1.69488	2.10946	-6.54034	1.58865e-10	3.51404e-09	10.4682	DOWN	2.22098	4.34354	0.456646	0.884101	4.02724	3.21107	2.46903	3.63507	3.76934	2.59794	4.59001	4.14919	1.87724	0	0	3.10031	2.156	0	0	3.76131	0	0	2.88321	2.53663	1.3433	1.46785	1.72214	0	3.67782	2.6622	2.4071	2.47907	0	0.78858	4.89308	3.45391	3.303	3.53456	4.91815	3.71793	5.00382	4.90147
hsa-miR-99a-5p	-1.42678	9.82453	-5.07289	5.62841e-07	7.90303e-06	2.50284	DOWN	9.80601	11.8642	9.32648	7.30005	10.8526	10.7554	9.93485	10.287	11.6629	9.64174	12.1437	12.0074	9.72696	9.60145	7.78306	12.5067	10.4768	8.41584	8.71046	11.5343	7.22463	7.21065	11.0629	8.71046	9.76616	8.86294	9.76616	8.97474	11.1181	9.97585	10.1943	10.0177	8.03938	8.11396	12.0761	10.6581	10.4768	11.2884	11.7976	10.1943	12.5067	12.4315
[truncated: 435 more columns]
